# Supplementary material for: CDT1 inhibits CMG helicase in early S phase to separate origin licensing from DNA synthesis
Source: PubMed Central journal article supplement (PMC7614657; doi:10.1016/j.molcel.2022.12.004), 2023-01-05
Supplement: EMS176983-supplement-Figures_S1_S7.pdf [file EMS176983-supplement-Figures_S1_S7.pdf]

**Molecular Cell, Volume 83**

**Supplemental information**

**CDT1 inhibits CMG helicase in early S phase  
to separate origin licensing from DNA synthesis**

**Nalin Ratnayake, Yasemin Baris, Mingyu Chung, Joseph T.P. Yeeles, and Tobias Meyer**

Figure S1

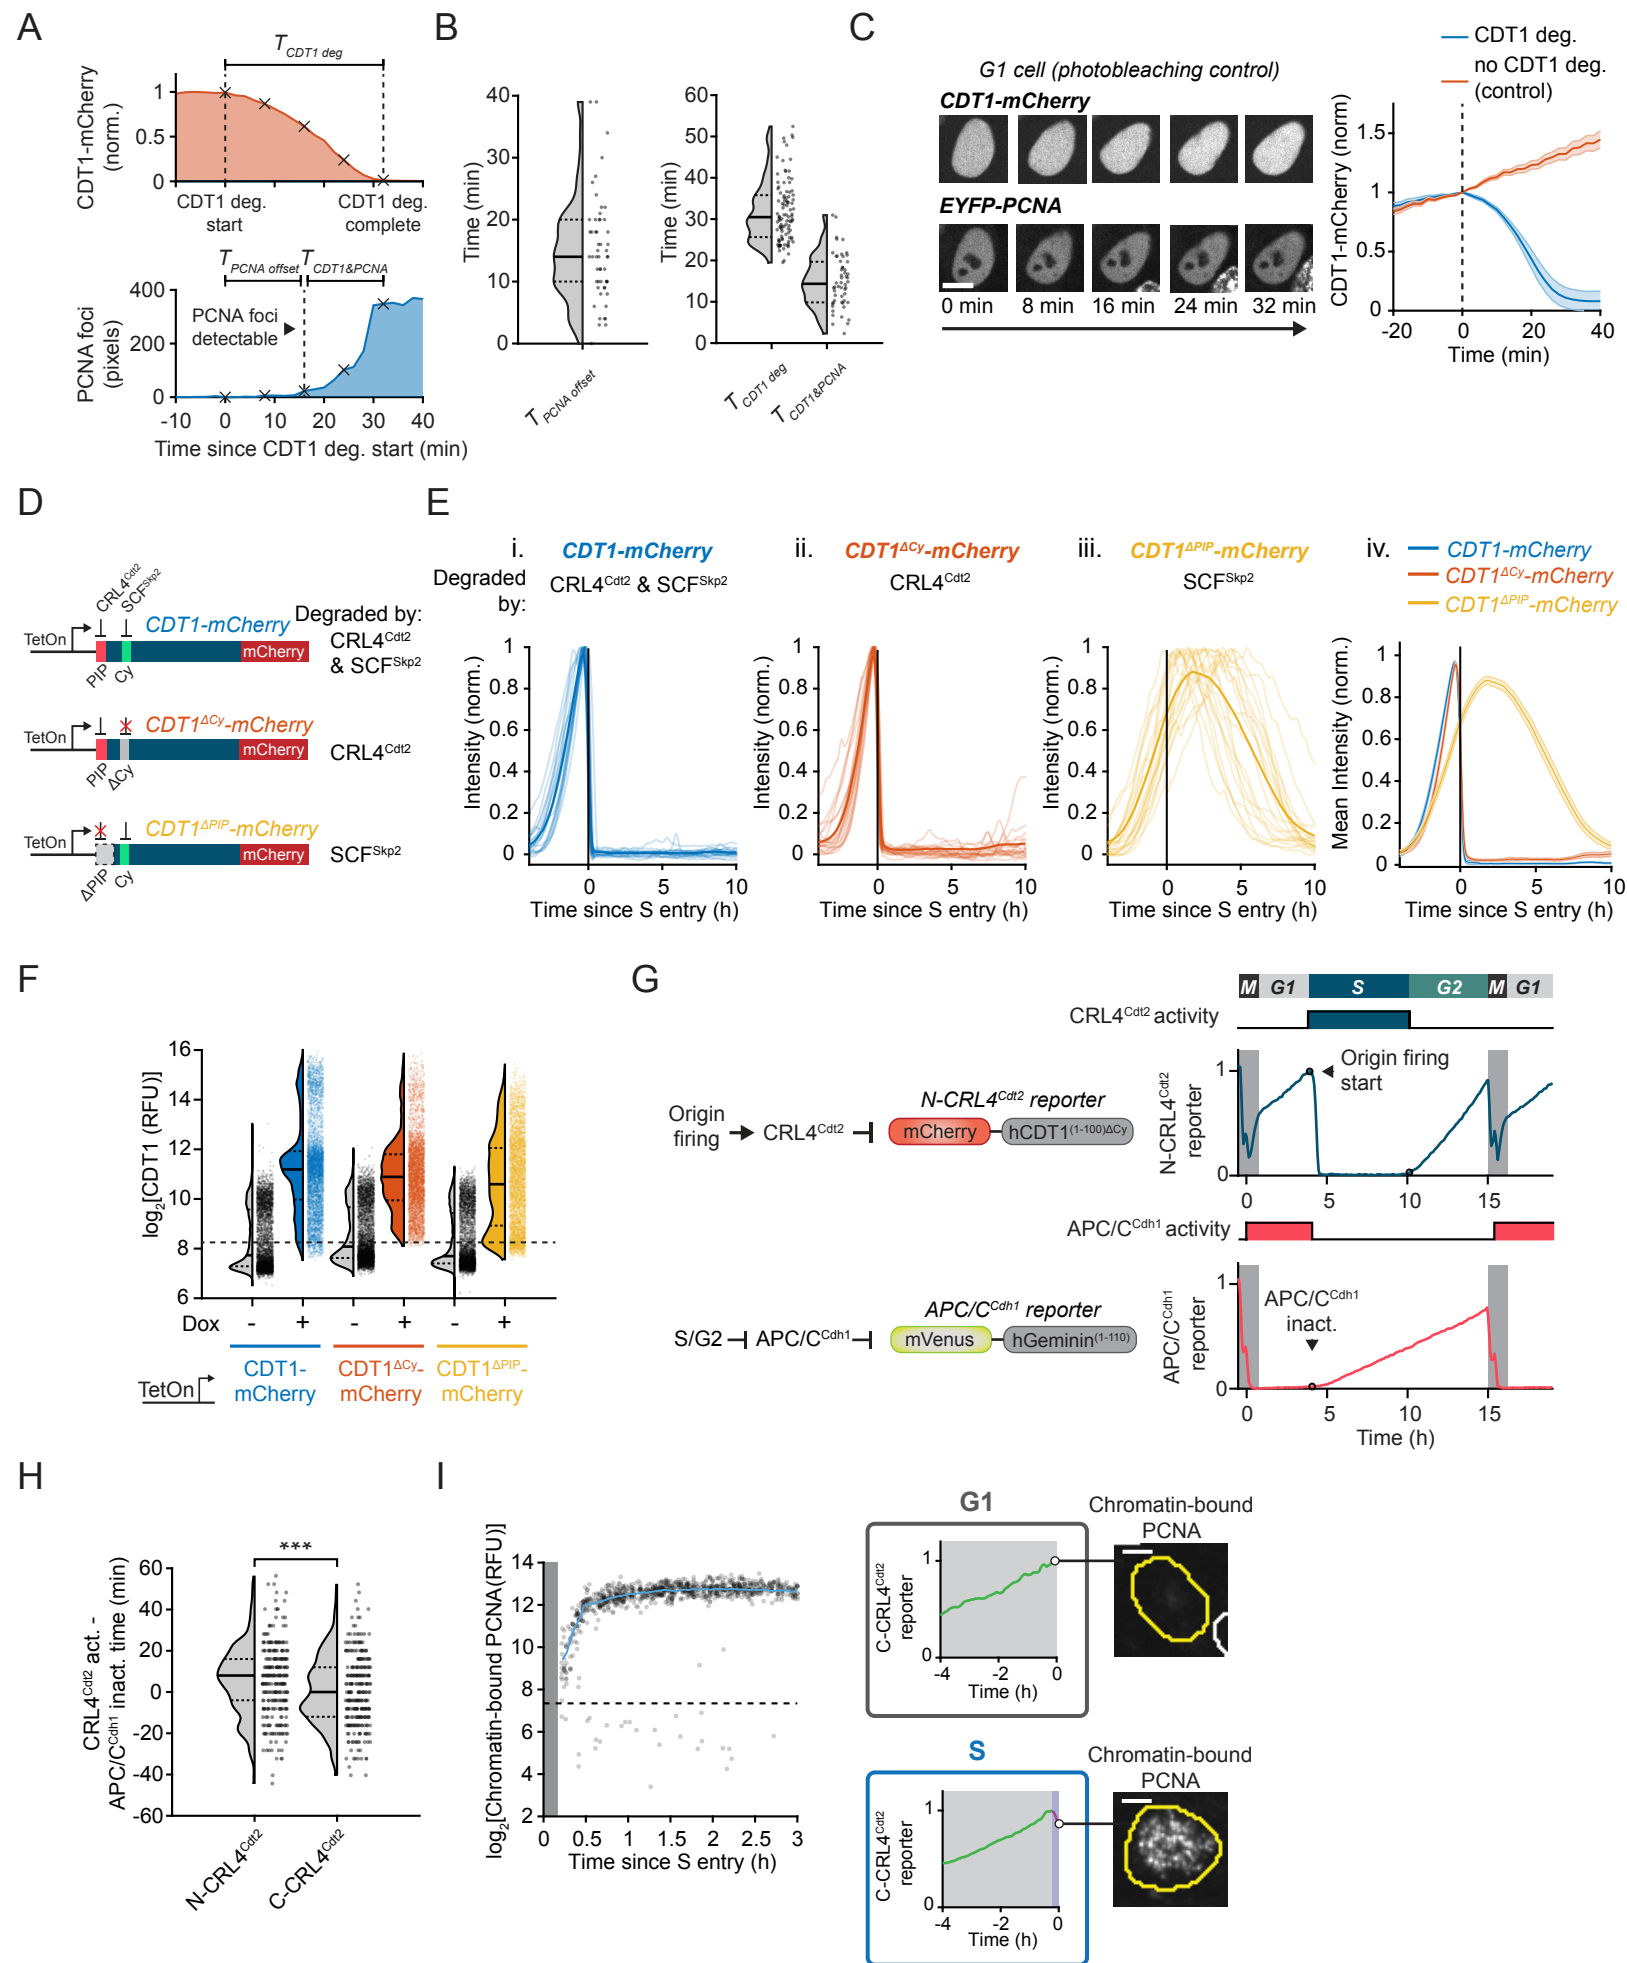

**Figure S1. Active CDT1 is present together with fired origins in early S phase, related to Figure 1**

(A-C) MCF10A cells expressing EYFP-PCNA and doxycycline (Dox)-inducible CDT1-mCherry (induced 6 h prior to imaging) were imaged using confocal microscopy.

(A) Quantification of PCNA foci detection relative to CDT1 degradation in cells from Figure 1B. The start of CDT1 degradation and first detectable PCNA foci ( $T_{PCNA\ offset}$ ), the total time it takes for CDT1 to be degraded ( $T_{CDT1\ deg}$ ), and the overlap duration when CDT1 and PCNA foci are simultaneously visible ( $T_{CDT1\ \&\ PCNA}$ ) were determined.  $T_{PCNA\ offset}$  represents the amount of time it takes for PCNA foci to grow large enough to be detectable over soluble pool of PCNA following the start of origin firing and CDT1 degradation. Black  $\times$  corresponds to frames shown in example cell in Figure 1B.

(B) Left:  $T_{PCNA\ offset}$ ,  $n = 54$  cells. Right:  $T_{CDT1\ deg}$  ( $n = 99$  cells) and  $T_{CDT1\ \&\ PCNA}$  ( $n = 54$  cells). Cells pooled from 4 independent experiments.

(C) CDT1-mCherry signal in cells not entering S phase as photobleaching control. Note that imaged cells not entering S phase do not reduce CDT1-mCherry signal. Left: representative cell imaged over same interval as Figure 1B. Scale bar = 10  $\mu\text{m}$ . Right: CDT1-mCherry signal in cells undergoing S phase entry (CDT1 deg.;  $n = 28$  cells) and not undergoing S phase entry (no CDT1 deg.;  $n = 107$  cells). Shaded area is mean  $\pm 2 \times \text{SEM}$ .

(D) Mutational analysis of CDT1 Cy motif (necessary for degradation by SCF<sup>Skp2</sup>) and PIP degron (necessary for degradation by CRL4<sup>Cdt2</sup>) to identify E3 ubiquitin ligase primarily responsible for early S phase CDT1 degradation. Dox-inducible CDT1 mutants with Cy motif (CDT1 <sup>$\Delta$ Cy</sup>) or PIP degron (CDT1 <sup>$\Delta$ PIP</sup>) removed were analyzed in MCF10A cells. Double-mutant CDT1(ND-CDT1 from Figure 2 and Figure S3) is stable in S phase.

(E) CDT1 mutant degradation relative to S entry (PCNA foci appearance). (i-iii) Mean trace (bold) and 20 representative cell traces. (iv) Mean trace  $\pm 2 \times \text{SEM}$ .  $n \geq 192$  cells. Representative of 3 independent experiments.

(F) QIBC of CDT1 immunofluorescence (detects endogenous and exogenous CDT1) of Dox-induced cells with mutant CDT1 compared to endogenous levels (uninduced cells). Dashed line indicates negative staining threshold.  $n = 5,000$  cells.

(G) Live-cell reporters of CRL4<sup>Cdt2</sup> and APC/C<sup>Cdh1</sup> activity. APC/C<sup>Cdh1</sup> reporter is degraded throughout G1 and rises after APC/C<sup>Cdh1</sup> inactivation. Example traces of N-CRL4<sup>Cdt2</sup> reporter and APC/C<sup>Cdh1</sup> reporter in MCF10A cells are shown on right.

(H) CRL4<sup>Cdt2</sup> activation timing for N-CRL4<sup>Cdt2</sup> and C-CRL4<sup>Cdt2</sup> reporters relative to APC/C<sup>Cdh1</sup> inactivation in cycling MCF10A cells. Lower values indicate earlier CRL4<sup>Cdt2</sup> activation relative to APC/C<sup>Cdh1</sup> inactivation.  $n = 300$  cells each condition, representative of 2 independent experiments. \*\*\*  $p$ -value =  $1.3 \times 10^{-4}$ , two-sample  $t$ -test. 95% confidence interval 2.6-8.0 min earlier.

(I) RT-QIBC of chromatin-bound PCNA after degradation of the C-CRL4<sup>Cdt2</sup> reporter starts. Left: Dashed line is PCNA threshold. Grey bar is unobserved period due to the need to have 12 min of reporter degradation to call S phase start. The small percentage of cells below the threshold (2.51% of 10,113 cells) had misidentified C-CRL4<sup>Cdt2</sup> degradation by automated algorithm, verified manually. Representative of 2 independent experiments. Right: Example traces and chromatin-bound PCNA stain in G1 (no C-CRL4<sup>Cdt2</sup> degradation) or just after S phase entry (C-CRL4<sup>Cdt2</sup> degradation). Scale bar = 5  $\mu\text{m}$ .

Dashed and solid lines in violin plots are IQR and median, respectively.

Figure S2

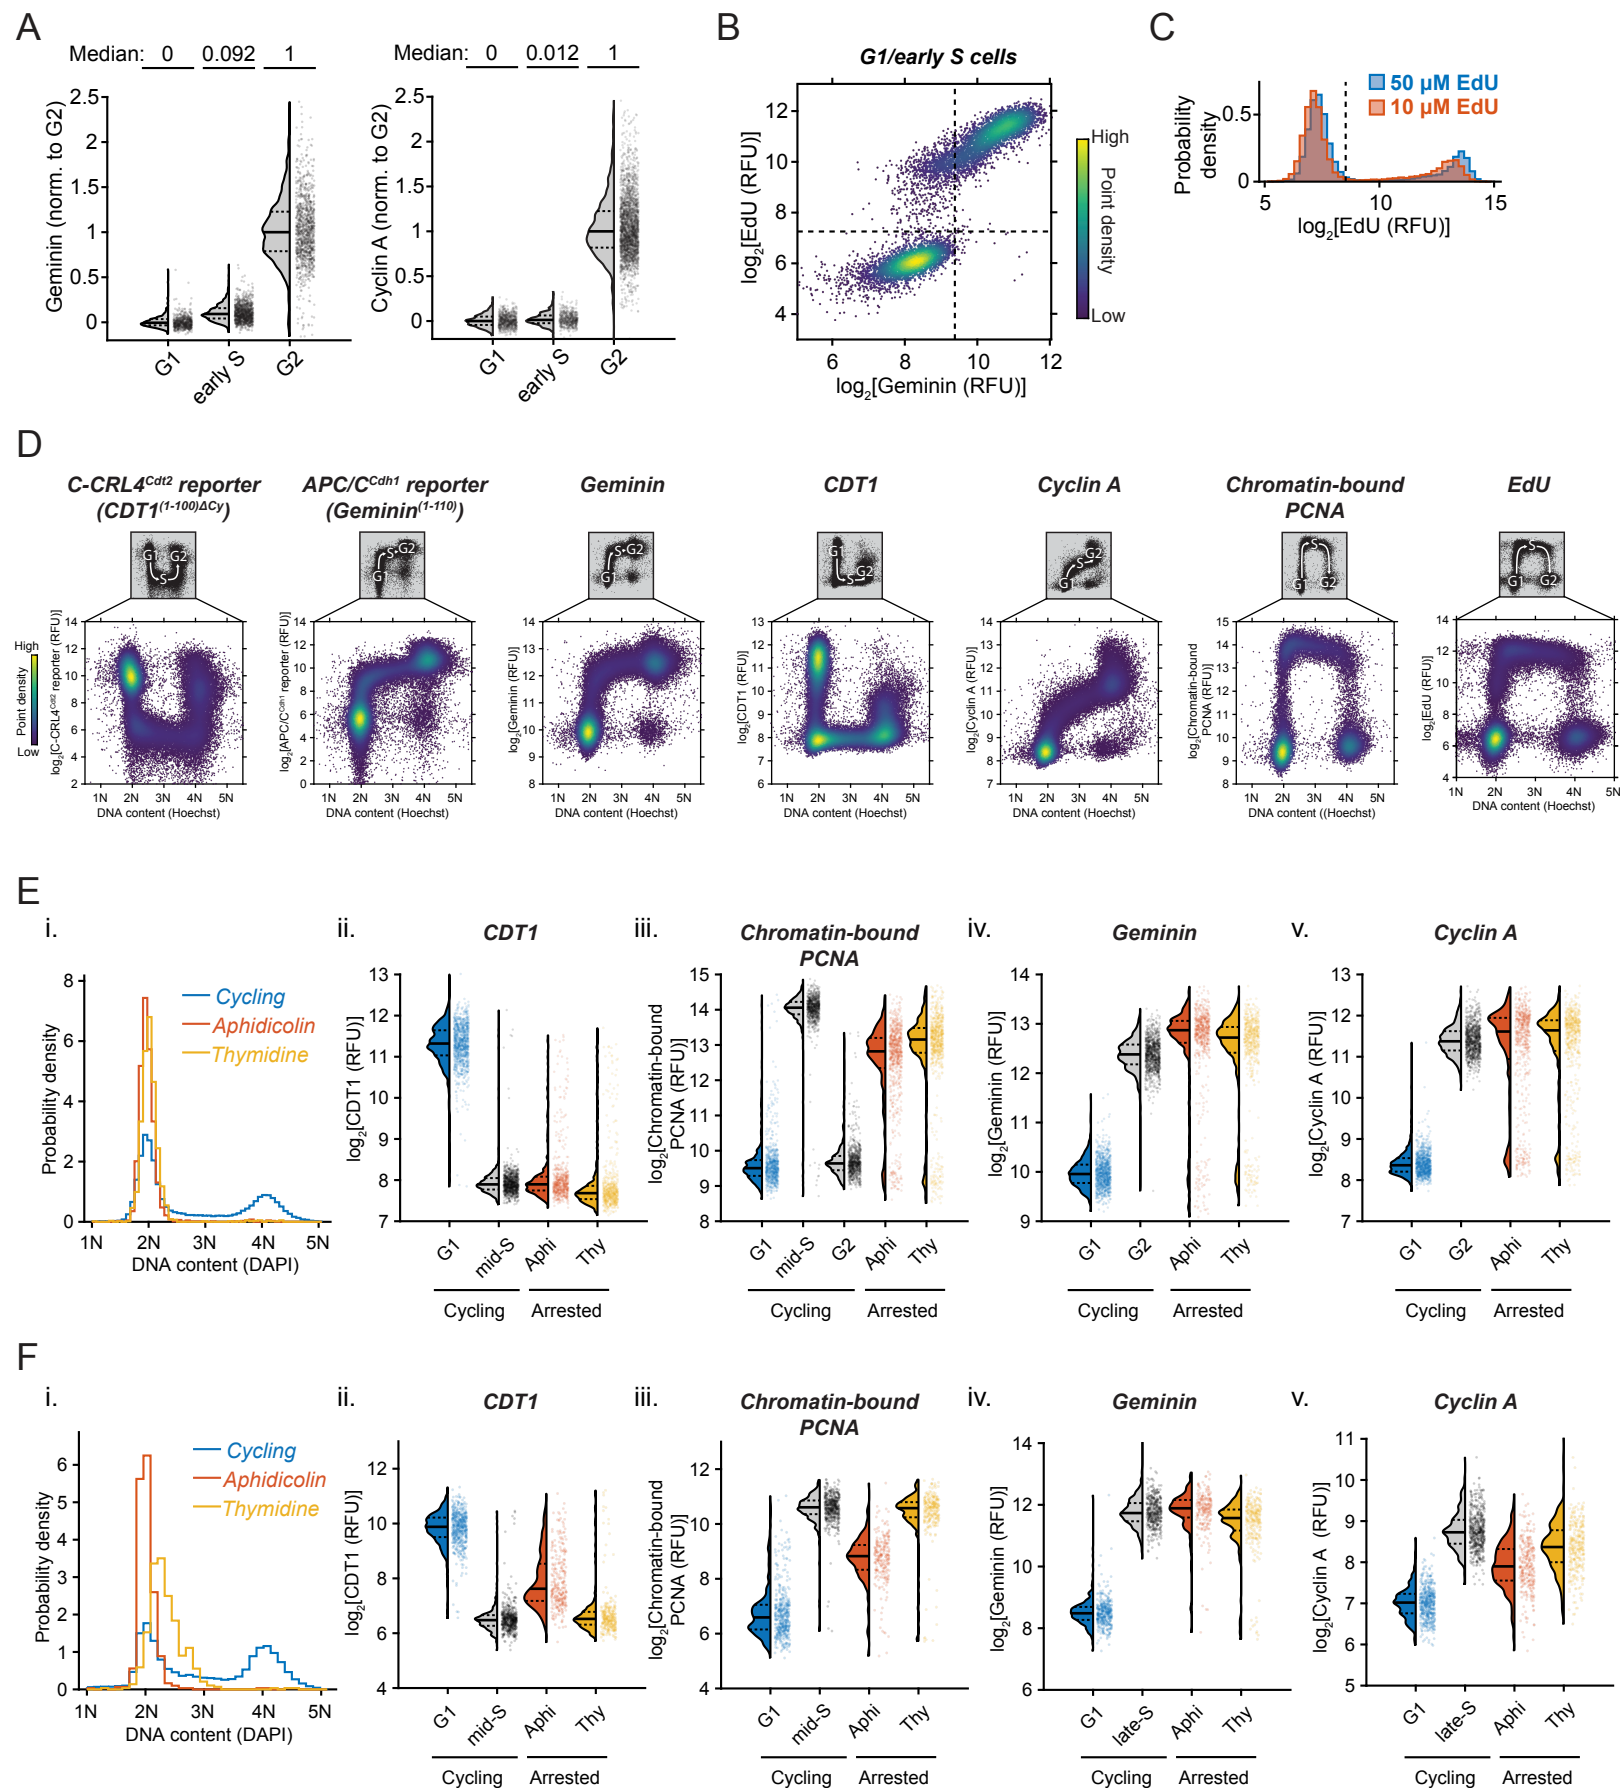



**Figure S2. Quantitative immunofluorescence analysis reveals protein dynamics during cell cycle, related to Figure 1**

**(A)** Geminin and Cyclin A immunofluorescence (IF) levels from RT-QIBC analysis in Figures 1F-G. Representative of 3 independent experiments. Left: Comparison of Geminin levels in G1 (n = 600 cells), early S (first 30 min, n = 1,051 cells) and G2 (4N DNA and EdU(-), n = 1,063 cells) cells. Right: Comparison of Cyclin A levels in G1 (n = 699 cells), early S (first 30 min, n = 503 cells) and G2 (4N DNA and EdU(-), n = 2,637 cells).

**(B)** RT-QIBC in cycling MCF10A cells of endogenous Geminin and EdU incorporation in cells in G1 to early S (cells selected 3-7 h post mitosis, n = 9,605 cells, representative of 3 independent experiments). Lines demarcate Geminin and EdU positive/negative regions. Note large population of EdU positive, Geminin negative cells, indicating cells which entered S phase with low Geminin.

**(C)** Comparison of EdU staining intensity from 8 min pulse of either 10  $\mu$ M or 50  $\mu$ M EdU. 50  $\mu$ M EdU was chosen for experiments due to slightly stronger signal. Dashed line is threshold for background EdU stain. n = 16,439 (50  $\mu$ M), 15,571 (10  $\mu$ M) cells.

**(D)** QIBC analysis of C-CRL4<sup>Cdt2</sup> (mCherry-CDT1<sup>(1-100) $\Delta$ Cy</sup>) and APC/C<sup>Cdh1</sup> (mVenus-Geminin<sup>(1-110)</sup>) reporter fluorescence, EdU stain, and Geminin, CDT1, Cyclin and chromatin-bound PCNA IF intensity in MCF10A cells. Plotted against DNA content (Hoechst). Diagram above plots indicates inferred cell trajectory from G1 to S to G2. n  $\geq$  28,046 per condition. Representative of 3 independent experiments.

**(E)** QIBC analysis. (i) DNA content (DAPI stain) in cycling (no drug) or arrested cells. Quantitative IF analysis of CDT1 (ii), chromatin-bound PCNA (iii), Geminin (iv) and Cyclin A (v) levels in MCF10A cells arrested by 2  $\mu$ g/mL aphidicolin or 2 mM thymidine for 16 h. Cells were initially live-imaged, and cells that received drugs 0 - 2 h after mitosis (in G1) were analyzed to exclude cells arrested in S or G2 phase. n  $\geq$  2,777 per condition. (ii-v) IF analysis comparing arrested cells against G1 (1-3 h after mitosis), mid-S (2-3 h after S entry, determined by C-CRL4<sup>Cdt2</sup> reporter), or G2 (0-3 h after G2 entry, determined by C-CRL4 reporter rise at S/G2 transition) cells in cycling cell population. Note that arrested cells are more similar to S or G2 cells, with low CDT1, and high chromatin-bound PCNA, Geminin, and Cyclin A. n = 1,000 per condition. Data pooled from 4 replicate wells.

**(F)** Same as (E) performed in U2OS cells arrested by 2  $\mu$ g/mL aphidicolin or 2 mM thymidine for 15 h. Cells were initially live-imaged, and cells that received drugs 0 - 2 h after mitosis (in G1) were analyzed to rule out cells arrested starting in S or G2 phase. (i) DNA content (DAPI stain) in cycling (no drug) or arrested cells. n  $\geq$  811 per condition. (ii-v) IF analysis comparing arrested cells against G1 (1-3 h after mitosis), mid-S (2-3 h after S entry, determined by N-CRL4<sup>Cdt2</sup> reporter), or late-S (15-17 h after mitosis) cells in cycling cell population. n = 400 per condition. Data pooled from 4 replicate wells.

Dashed and solid lines in violin plots are IQR and median, respectively.

Figure S3

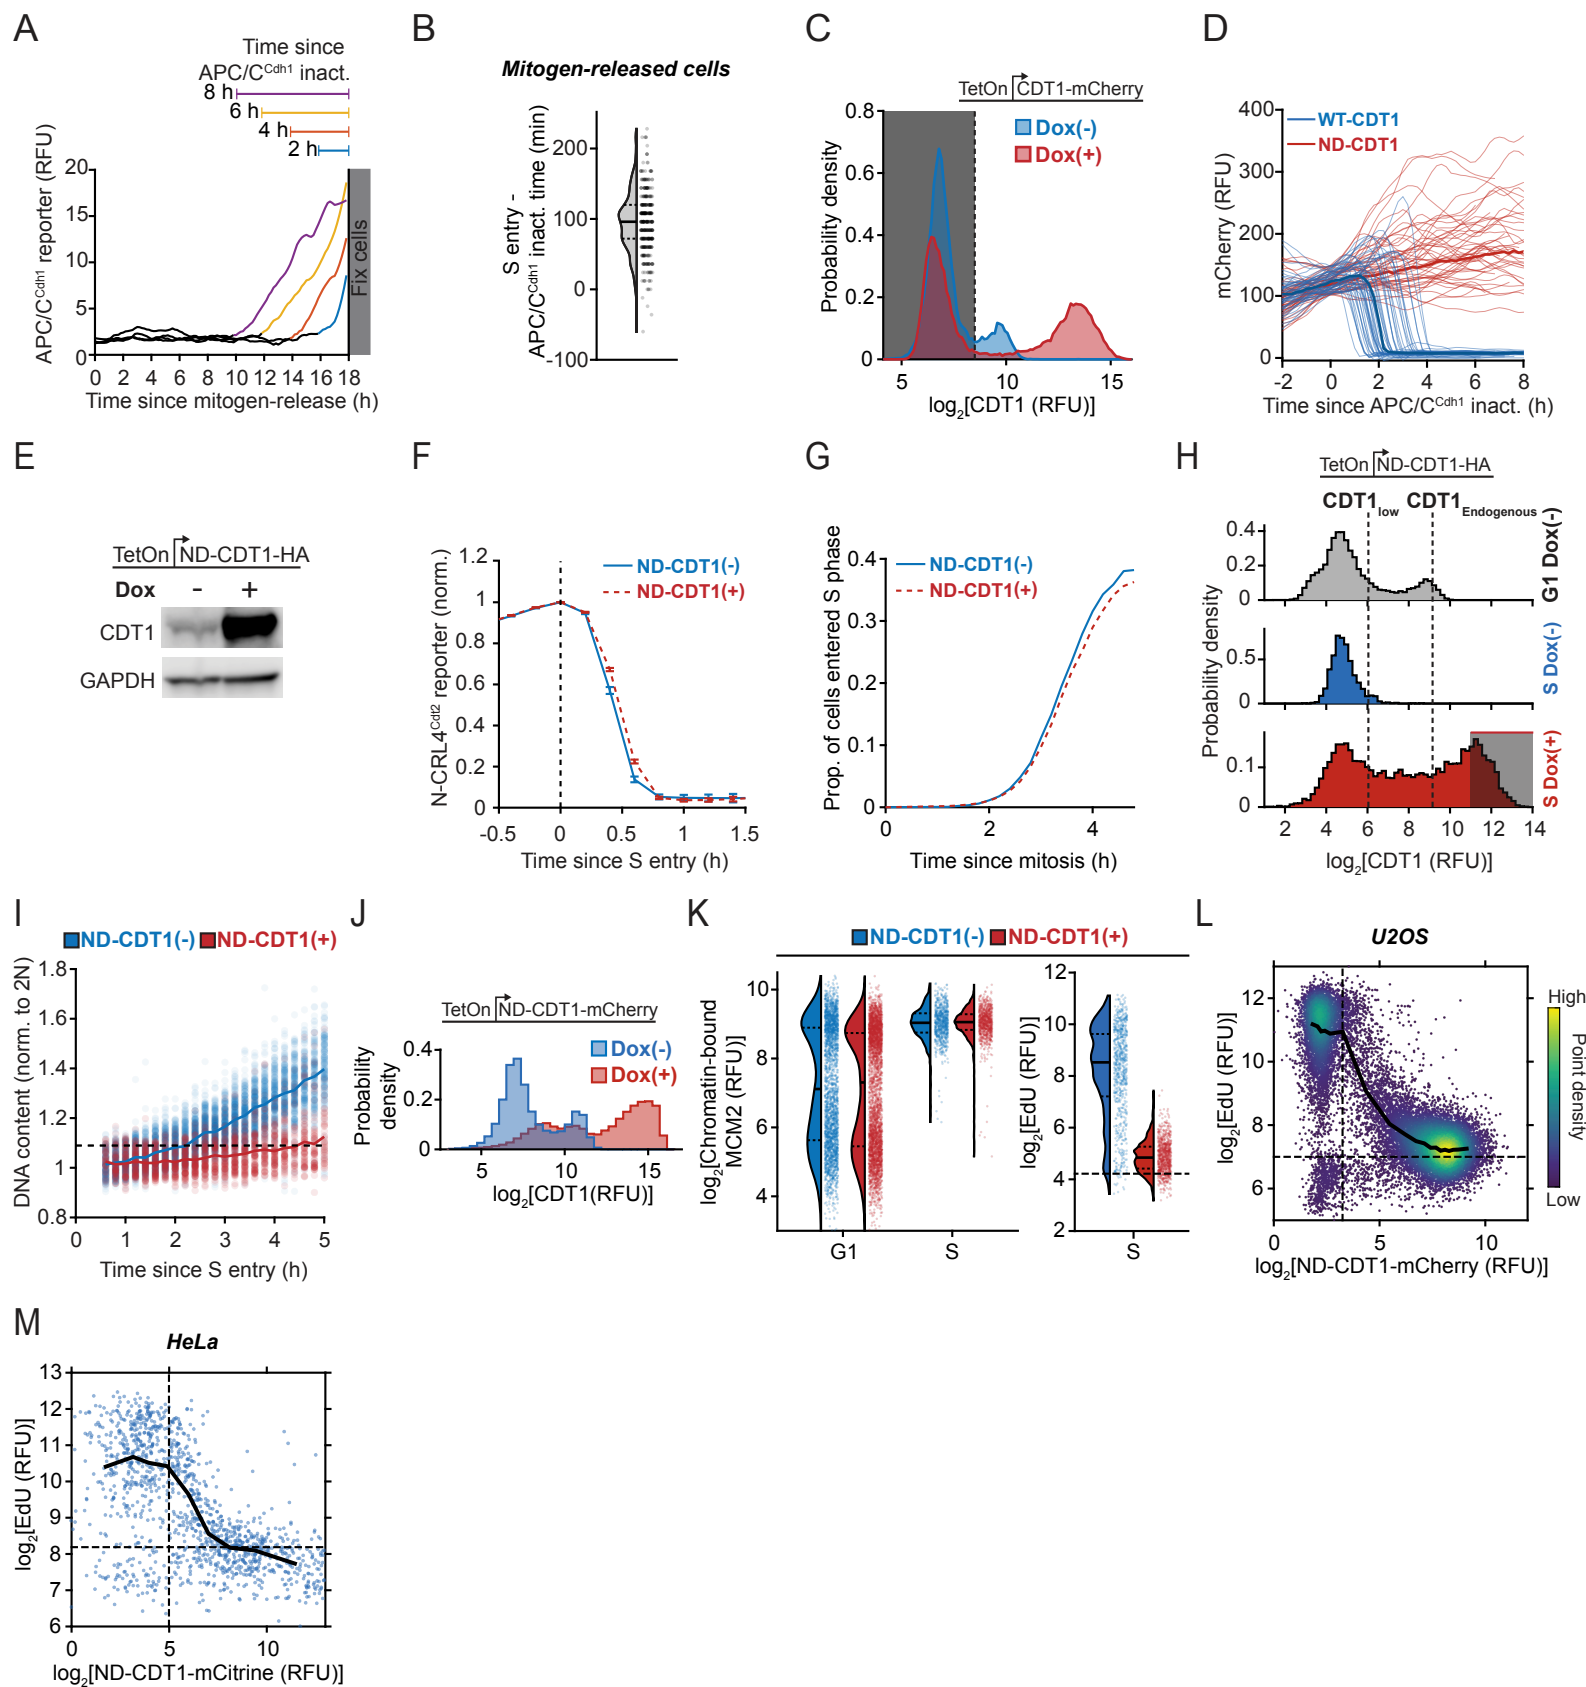

**Figure S3. DNA synthesis is inhibited in the presence of CDT1, related to Figure 2**

- (A) Example traces of cells from Figure 2B that inactivated APC/C<sup>Cdh1</sup> 2, 4, 6, and 8 h prior to fixation.
- (B) Time between APC/C<sup>Cdh1</sup> inactivation and CRL4<sup>Cdt2</sup> activation (N-CRL4<sup>Cdt2</sup>) in mitogen-released cells (compare to cycling cells, Figure S1H). n = 400 cells, representative of 3 independent experiments.
- (C) Cells from same experiment as Figure 2B. QIBC of CDT1 immunofluorescence (IF) staining (detecting endogenous CDT1 as well as CDT1-mCherry). Dox(+) was induced with doxycycline (Dox) for 24 h. Cells pooled from 5 wells in each condition (n ≥ 22,350 cells).
- (D) CDT1-mCherry and ND-CDT1-mCherry as mitogen-released MCF10A cells enter S phase. n = 185 (CDT1) and 205 (ND-CDT1) cells. Traces were aligned to APC/C<sup>Cdh1</sup> inactivation.
- (E) Western blot of ND-CDT1-HA expression in MCF10A cells induced by Dox for 6 h as in Figure 2E. Antibody detects endogenous CDT1 and ND-CDT1. CDT1 MW: 60.4 kDa, ND-CDT1-HA MW: 60.9 kDa.
- (F, G) N-CRL4<sup>Cdt2</sup> reporter degradation with and without ND-CDT1 induction (in same experiment as Figure 2E). Cells were Dox-induced for 6 h during imaging.
- (F) Mean N-CRL4<sup>Cdt2</sup> reporter intensity following degradation start. Error bars are mean ± 2×SEM (ND-CDT1(-): n = 547 cells, ND-CDT1(+): n = 1,644 cells).
- (G) Proportion of cells entering S phase (N-CRL4<sup>Cdt2</sup> reporter degraded) following mitosis. ND-CDT1(-): n = 7,637 cells, ND-CDT1(+): n = 8,880 cells.
- (H) ND-CDT1 expression relative to normal G1 expression levels of CDT1 measured by QIBC in mitogen-released MCF10A cells for Figures 2G, 3F, and 3G. Top: CDT1 in G1 cells without Dox (n = 15,544). Typical endogenous CDT1 at the end of G1 (CDT1<sub>Endogenous</sub>) are median value of cells above the mode of CDT1 expression in CDT1 positive cells. Middle: S phase cells (0.5-1 h after CRL4<sup>Cdt2</sup> activation) without Dox (n = 250), representing fully degraded CDT1 levels (CDT1<sub>low</sub>). Bottom: S phase cells induced with Dox (n = 2,417 cells) in S phase. Shaded bar is gate used for ND-CDT1(+) cells for Figure 2G.
- (I) DNA content measured by Hoechst stain in same cells as in Figure 2G, normalized to 2N DNA. Curve is median value. ND-CDT1(-): n = 5,500 cells, ND-CDT1(+): n = 2,000 cells.
- (J) ND-CDT1-mCherry in Dox-inducible cell line. ND-CDT1-mCherry was induced with Dox for 18 h, and cells were fixed and stained using anti-CDT1 antibody (detects endogenous and exogenous CDT1). n = 66,817(Dox(-)), 64,545 (Dox(+)) cells.
- (K) RT-QIBC of chromatin-bound MCM2 levels (measuring licensed origins) and EdU incorporation. ND-CDT1-mCherry was expressed in mitogen-released cells. G1 cells (no APC/C<sup>Cdh1</sup> inactivation) and S phase cells (1-2 h post APC/C<sup>Cdh1</sup> inactivation) were identified. n = 3,418 cells per condition. Representative of 2 independent experiments.
- (L) QIBC of U2OS cells with ND-CDT1-mCherry induced by Dox for 6 h. Early S phase cells were identified as 2N DNA and positive for Geminin stain and EdU incorporation. Thresholds are negative stain threshold. Black line is median EdU value in bins of ND-CDT1. n = 19,866 pooled from 8 wells.
- (M) ND-CDT1-mCitrine was transiently transfected into HeLa cells expressing the APC/C<sup>Cdh1</sup> reporter. RT-QIBC was performed after live-imaging both ND-CDT1-mCitrine and APC/C<sup>Cdh1</sup> reporter levels for 15 h. EdU incorporation in early S phase cells (2N DNA, APC/C<sup>Cdh1</sup> reporter positive) was measured and plotted according to their ND-CDT1-mCitrine levels. n = 1,269 cells, pooled from 3 wells.
- Dashed and solid lines in violin plots are IQR and median, respectively.

Figure S4

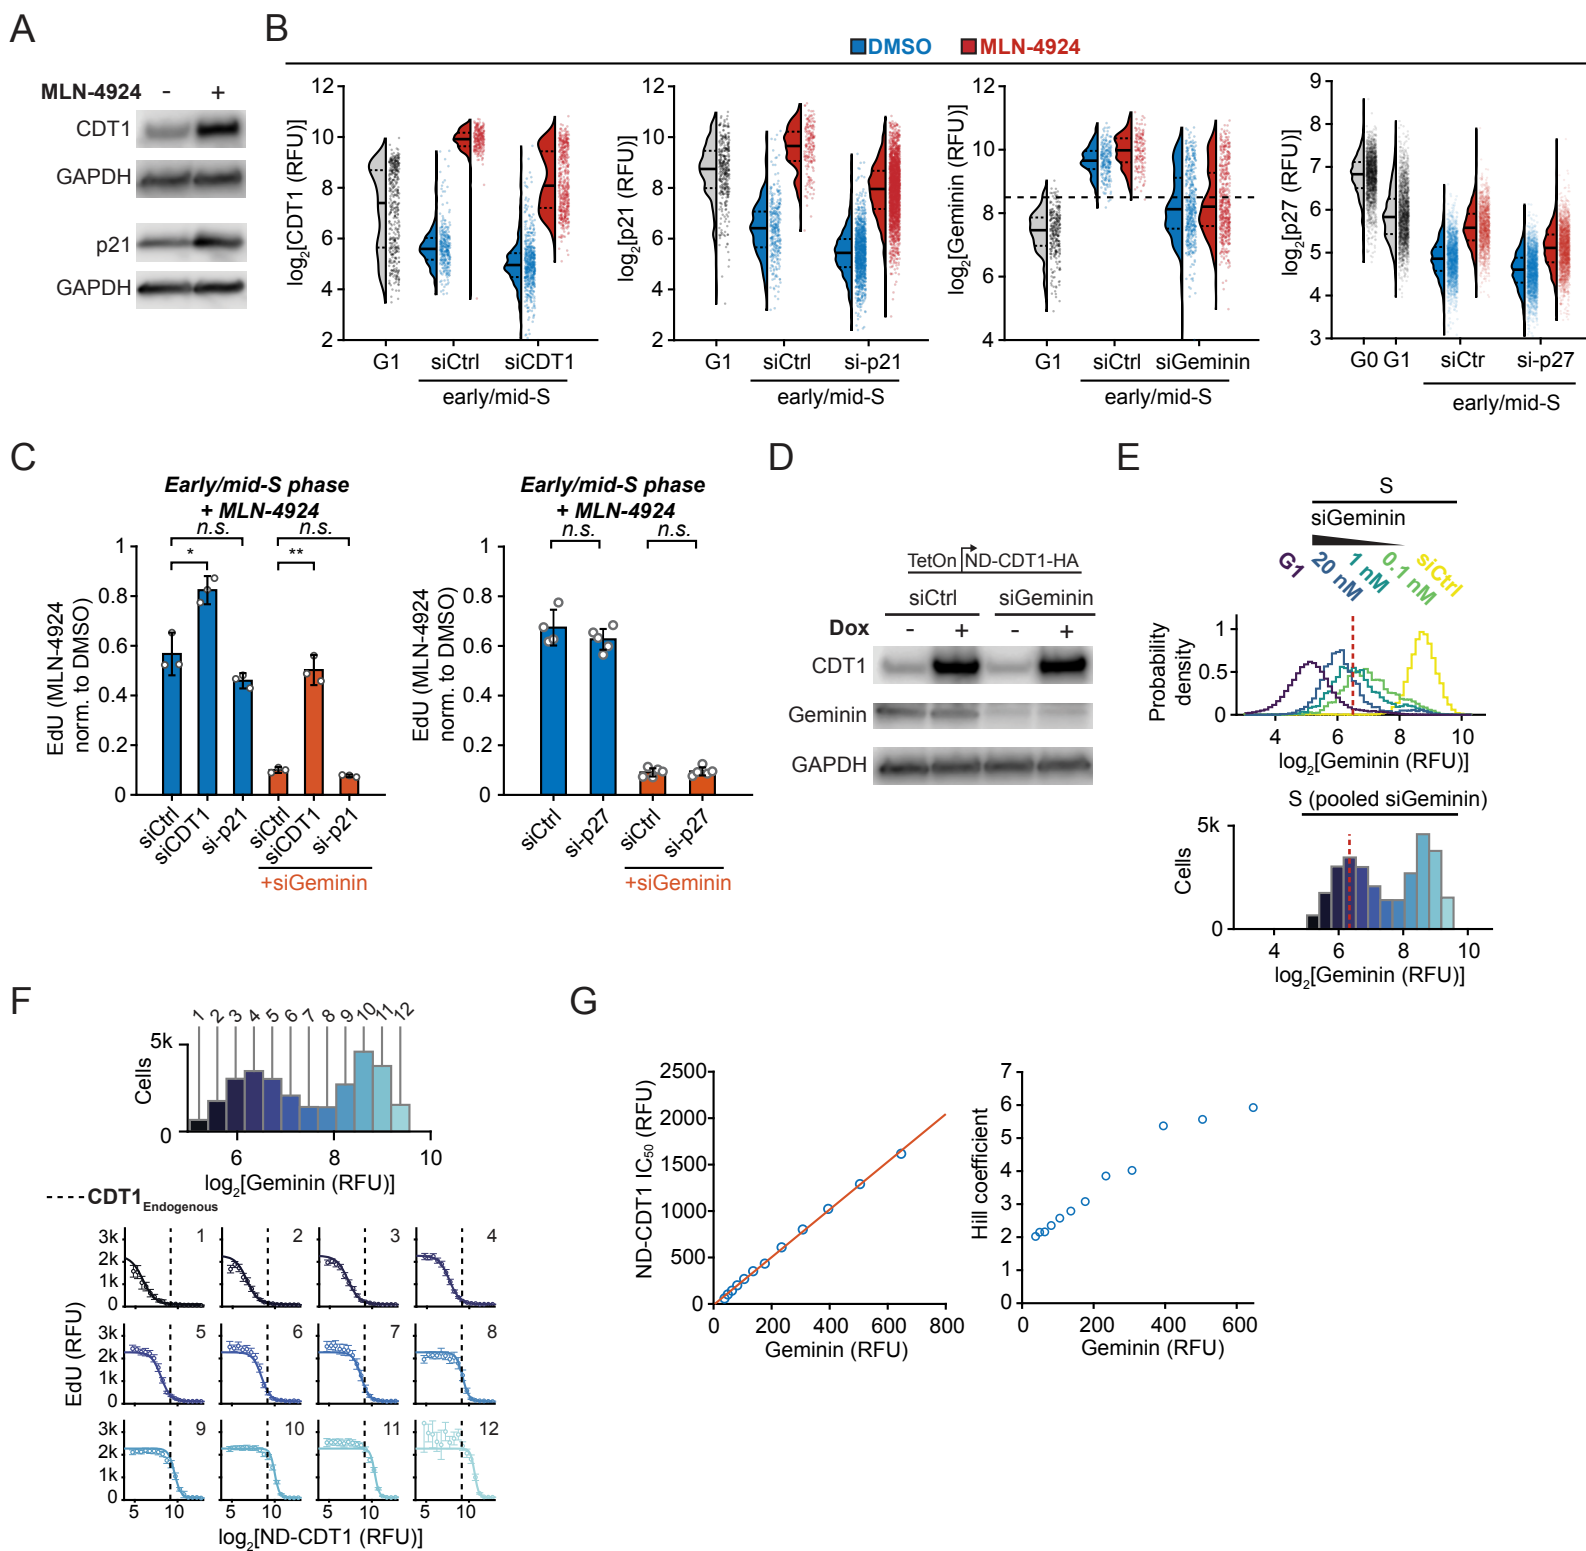

**Figure S4. Endogenous CDT1 can inhibit DNA synthesis and is counteracted by Geminin, related to Figure 3**

**(A)** MCF10A cells were treated with MLN-4924 for 4 h and analyzed using western blot.

**(B-D)** QIBC in cells expressing APC/C<sup>Cdh1</sup> reporter and Cyclin E/A-CDK reporter (see Methods and Figure S5H) were mitogen-released. MLN-4924 was added 4 h prior to fixation. Gating for early/mid-S phase cells is based on APC/C<sup>Cdh1</sup> reporter intensity in 2N-3N cells with  $\geq 0.8$  Cyclin E/A-CDK activity.

**(B)** Validation of changes in protein levels with MLN-4924 and siRNA knockdowns. G1 cells were negative for APC/C<sup>Cdh1</sup> reporter and EdU incorporation, with intermediate Cyclin E/A-CDK activity (0.5 - 0.8). G0 cells (p27 panel) were serum-starved, unreleased cells (included as positive control for p27 levels since MCF10A cells contain low levels of p27 in serum). G0 and G1 cell groups were determined from control siRNA-treated cells.  $n \geq 174$  cells for all conditions. For Geminin plot, dashed line is threshold below which cells with siGeminin were considered fully knocked down in Figure S4C. Data pooled from 3 (CDT1, p21, Geminin) or 4 (p27) wells. Dashed and solid lines in violin plots are IQR and median, respectively.

**(C)** Impact of siRNA knockdown on EdU incorporation in the presence of MLN-4924 in early/mid-S phase. Points are median values of cells in replicate wells, and bars are mean  $\pm 2 \times$  SEM of the medians. For siGeminin conditions, cells with low Geminin staining were selected. Left:  $n \geq 57$  cells per well (3 wells). Two-sample *t*-test: siCtrl – siCDT1 (\*  $p$ -value =  $3.7 \times 10^{-2}$ ), siCtrl – si-p21 (n.s.  $p$ -value =  $8.6 \times 10^{-2}$ ), siCtrl/siGeminin – siCDT1/siGeminin (\*\*  $p$ -value =  $4.5 \times 10^{-3}$ ), siCtrl/siGeminin – si-p21/siGeminin (n.s.  $p$ -value =  $8.0 \times 10^{-2}$ ). Right:  $n \geq 73$  cells per well (4 wells). Two-sample *t*-test: siCtrl – si-p27 (n.s.  $p$ -value = .24), siCtrl/siGeminin – si-p27/siGeminin (n.s.  $p$ -value = .78).

**(D)** Western blot validation of ND-CDT1 overexpression (CDT1 antibody detects endogenous CDT1 and ND-CDT1) and Geminin knockdown.

**(E)** Top: A range of Geminin levels in cells 2-3 h after S phase entry (N-CRL4<sup>Cdt2</sup> reporter) were produced by titrating siGeminin ( $n \geq 4,572$  cells for all conditions) for experiments in Figures 3G-3H. Dashed line is threshold for low Geminin levels, determined from G1 cell Geminin levels. Representative of 3 independent experiments. Bottom: Pooled S phase cells from all siGeminin conditions to generate a range of Geminin expression.

**(F)** Top: Cells from Figure S4E for all siRNA conditions were pooled together and separated into 12 bins for analysis of the impact of Geminin on EdU incorporation. ( $n = 29,350$  total cells). Bottom: Individual dose-response fits from Figure 3G. Dashed line represents endogenous CDT1 levels, determined from Figure S3H. Points and error bars are mean  $\pm 2 \times$  SEM for bins of ND-CDT1 expression for given Geminin level (bins  $\geq 6$  cells, median bin count 127).

**(G)** ND-CDT1 IC<sub>50</sub>(left) and Hill coefficient (right) for fit dose-response as a function of Geminin expression levels. Left: Line is linear regression fit ( $R^2 = .999$ ).



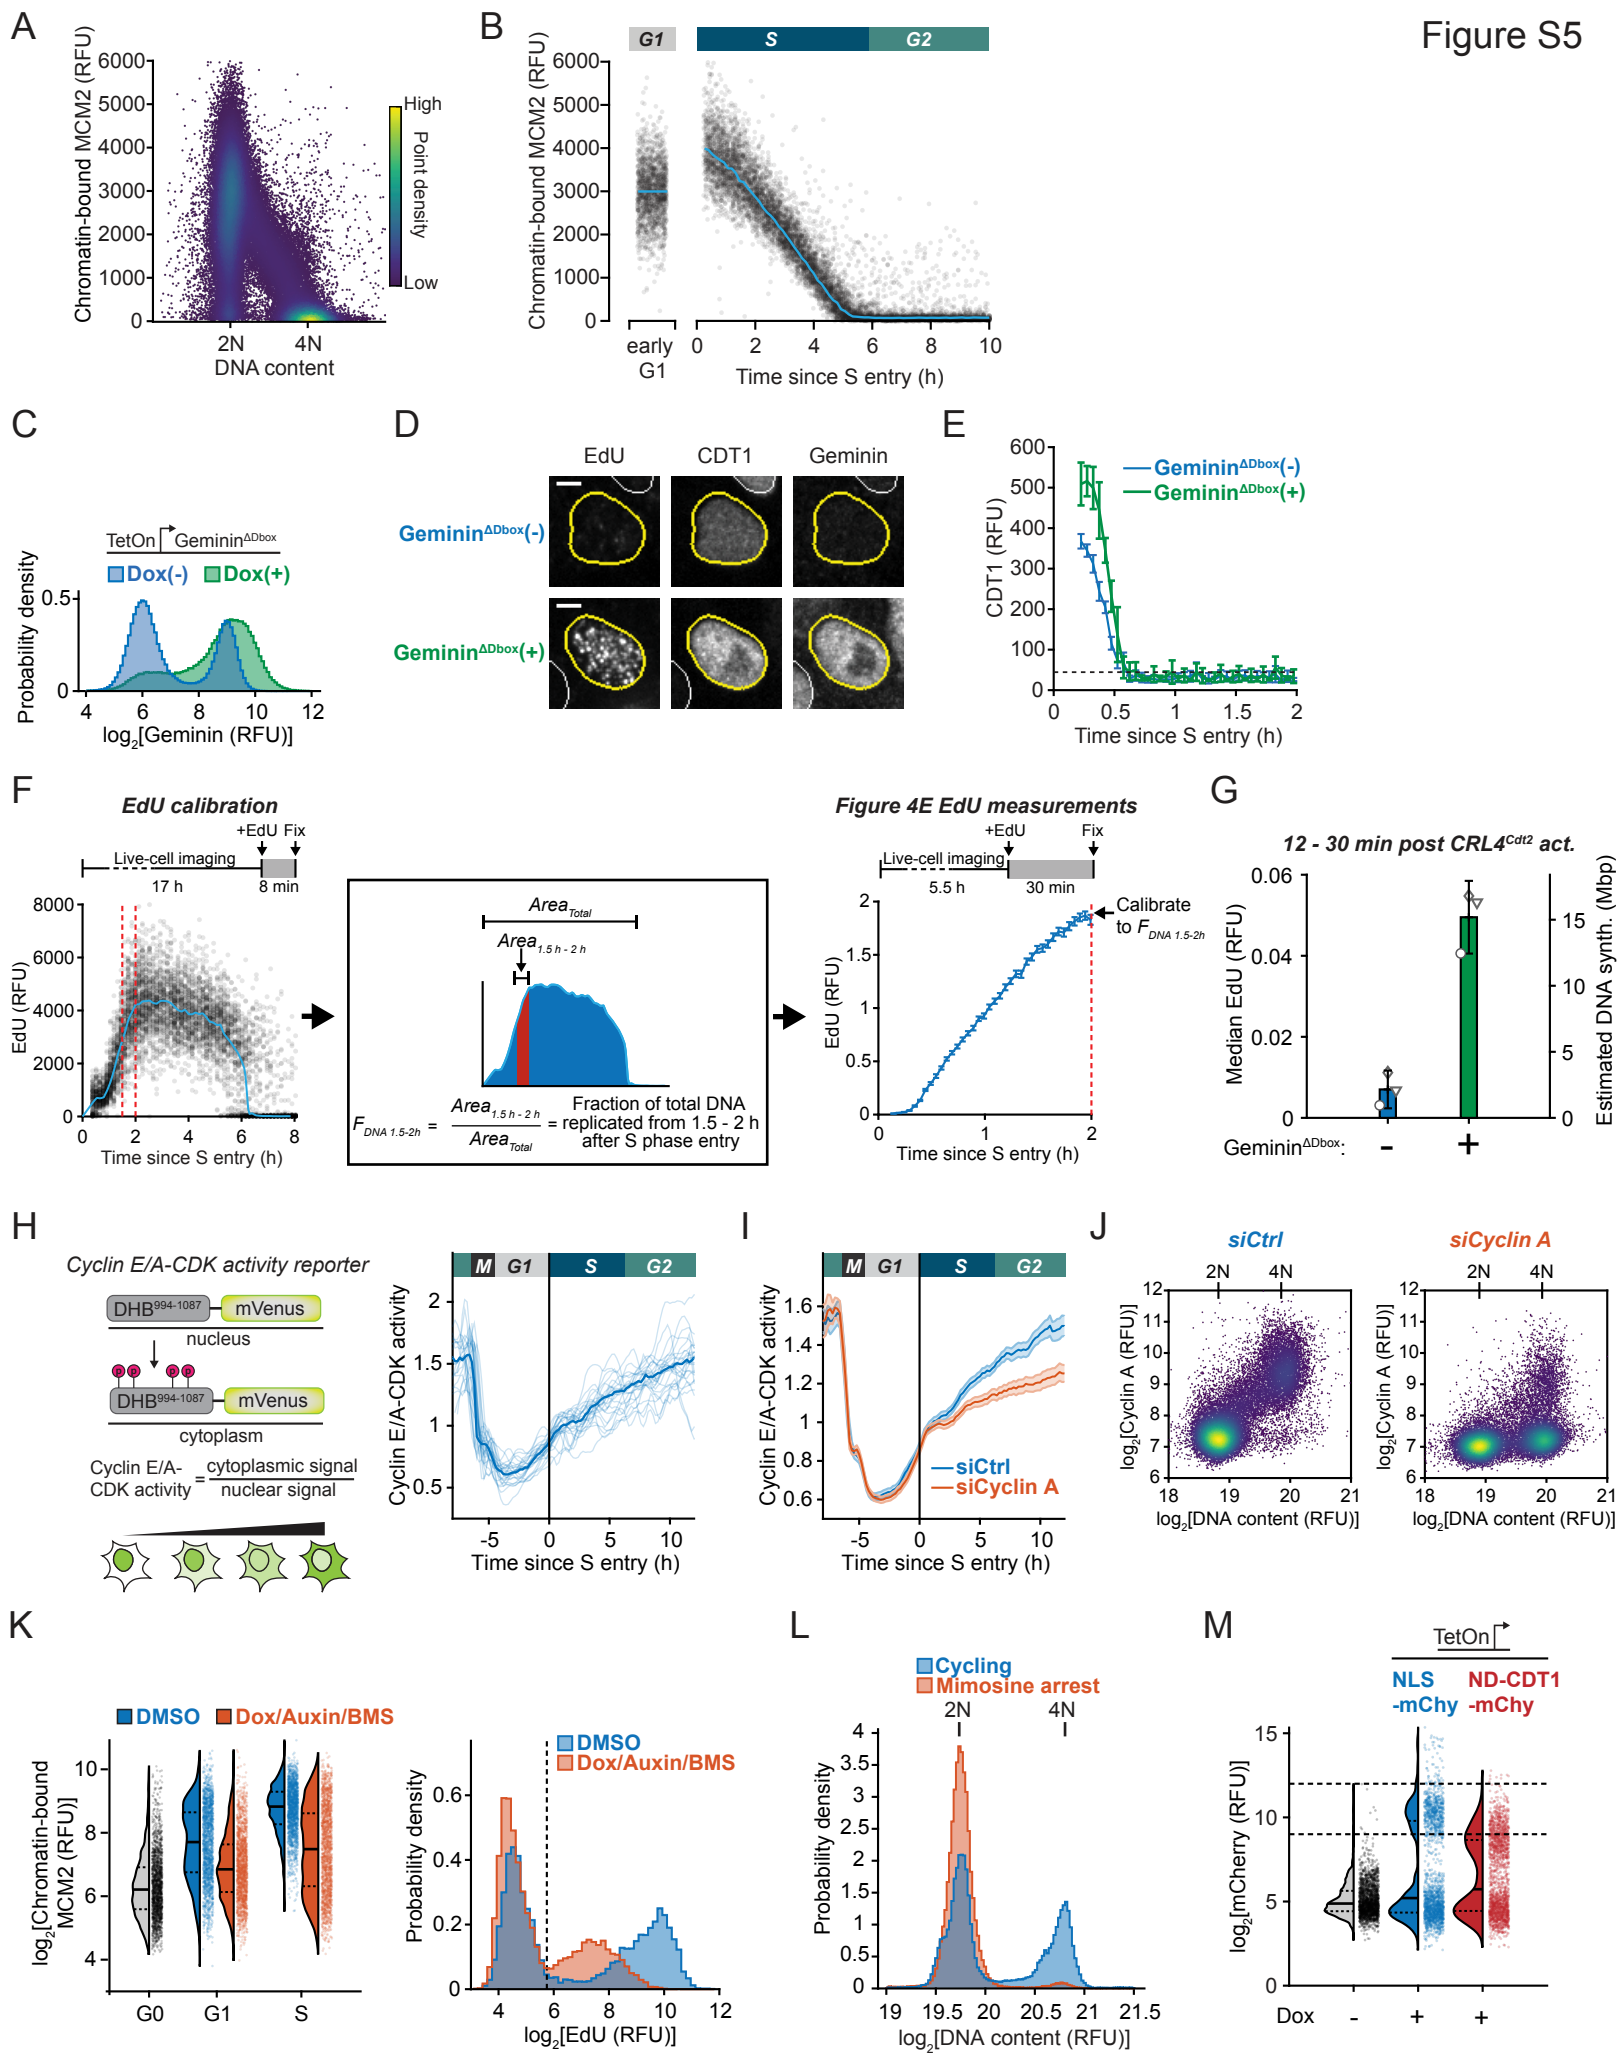



**Figure S5. CDT1 suppresses DNA synthesis during the overlap period of licensing and firing, independently of the global intra-S phase checkpoint and re-replication, related to Figure 4 and Figure 5**

- (A) QIBC of chromatin-bound MCM2 ( $n = 96,297$  cells) in cycling MCF10A cells as a function of DNA content. 2N DNA content was estimated from G1 DNA intensity. Same experiment as Figure S5B.
- (B) RT-QIBC of chromatin-bound MCM2, following S entry (C-CRL4<sup>Cdt2</sup> reporter,  $n = 10,000$  cells) and in early G1 (30 min – 1 h post anaphase,  $n = 1,500$  cells). Pooled from 5 wells. Curves are median values.
- (C) QIBC of Geminin <sup>$\Delta$ Dbox</sup> in doxycycline (Dox)-inducible cell line used in Figures 4 and S5. Geminin <sup>$\Delta$ Dbox</sup> was induced with Dox for 6 h and quantified with anti-Geminin antibody (detects endogenous Geminin and Geminin <sup>$\Delta$ Dbox</sup>).  $n = 147,420$  (Dox(-)), 150,706 (Dox(+)) cells.
- (D) Same example cells as shown in Figure 4F, co-stained for EdU incorporation, CDT1, and Geminin (detecting both endogenous Geminin and Geminin <sup>$\Delta$ Dbox</sup>). Scale bar = 5  $\mu$ m. Note, CDT1 levels are likely increased in response to Geminin <sup>$\Delta$ Dbox</sup> due to co-stabilization. However, CDT1 is inactivated by Geminin, and CDT1 is still degraded over the same 30 min period (Figure S5E).
- (E) RT-QIBC aligned to S entry (C-CRL4<sup>Cdt2</sup> reporter). Same experiment as in Figures 4E-F. Cells that had Dox added  $\leq 1$  h prior to mitosis were analyzed. Error bars and line are mean  $\pm 2 \times$  SEM in bins of cells (Geminin <sup>$\Delta$ Dbox</sup>(-):  $n = 3,436$ , Geminin <sup>$\Delta$ Dbox</sup>(+): 2,302 cells total,  $n \geq 32$  cells per bin). Representative of 3 independent experiments.
- (F, G) Calibration of EdU incorporation to absolute DNA synthesis from Figure 4E using RT-QIBC (C-CRL4<sup>Cdt2</sup> reporter). Absolute DNA synthesis (in base pairs) can be inferred by integrating EdU incorporation measurements (area under the curve), which estimates the total DNA EdU signal. The fraction of total DNA synthesis during a given period (a period 1.5-2 h after S phase entry was chosen as a calibration point. Denoted as  $F_{DNA\ 1.5-2h}$ ) can be estimated by taking the ratio of the area from 1.5 - 2 h after S phase entry (Area<sub>1.5-2h</sub>) to the total area (Area<sub>Total</sub>). In the experiment from Figure 4E, a 30 min EdU pulse was used, and thus the EdU intensity in cells 2 h after S phase entry in cells without Dox added would be equivalent to  $F_{DNA\ 1.5-2h}$ .
- (F) Left:  $F_{DNA\ 1.5-2h}$  was estimated by RT-QIBC of an 8 min EdU pulse at the end of imaging. Median EdU incorporation for each timepoint was used to determine area under the curve ( $n = 13,626$  cells). Middle: Calculation of area under curve. Left: EdU incorporation from a 30 min EdU pulse at the end of imaging. Line and error bars are mean  $\pm 2 \times$  SEM in cells within bins. Data pooled from 3 independent experiments ( $n = 33,208$  cells).
- (G) The EdU signal in Figure 4E was calibrated based on Figure S5F. Multiplying this by  $6 \times 10^9$  base pairs (approximate human diploid DNA) gives the equivalent amount of DNA synthesis in base pairs. For each of 3 independent experiments, the median of cells was taken ( $n \geq 31$  cells per replicate per condition, Geminin <sup>$\Delta$ Dbox</sup>(-) 120 cells total, Geminin <sup>$\Delta$ Dbox</sup>(+) 213 cells total). Error bars are mean  $\pm 2 \times$  SEM.
- (H) Left: Cyclin E/A-CDK activity reporter is initially nuclear localized in G0 and early G1 and gradually translocates to the cytoplasm in response to Cyclin E/A-CDK activity. Right: 25 sample traces of Cyclin E/A-CDK activity in MCF10A cells aligned to S entry (N-CRL4<sup>Cdt2</sup> reporter degradation). Thick line is median trace of 87 cells.
- (I) MCF10A cells analyzed as in S5H with siRNA knockdown of Cyclin A (siCCNA2). CCNA1 is not expressed in these cells. Line and shaded area are mean  $\pm 2 \times$  SEM.  $n = 129$  (siCtrl) or 191 (siCyclin A) cells. Representative of 2 independent experiments.
- (J) QIBC of Cyclin A immunofluorescence for validation of Cyclin A siRNA knockdown efficiency in MCF10A cells.  $n = 27,456$  (siCtrl), 22,718 (siCyclin A). Representative of two independent experiments.

**(K)** RPE-1 *TP53*<sup>-/-</sup> *CDC6*<sup>d/d</sup> cells were serum-starved in G0. Cells were then mitogen-released in the presence of Dox, Auxin, and BMS-650032 (BMS) to degrade CDC6 as cells re-enter the cell cycle and inhibit origin licensing, or with vehicle (DMSO) to permit origin licensing. Left: Cells were fixed 12 h after mitogen-release, and QIBC was performed on chromatin-bound MCM2. G0 cells are unreleased cells, and G1 and early S phase cells were chosen based on EdU. n = 2,000 cells for all conditions. Pooled from 2 wells in each condition. Dashed and solid lines in violin plots are IQR and median, respectively. Right: Cells were fixed 15 h after mitogen-release, and QIBC was performed on EdU incorporation. 2N DNA (G1/early S phase cells) were plotted, and dashed line is threshold for EdU incorporation, calculated from G0 cells. n = 12,380 cells (DMSO), 13,543 cells (Dox/Auxin/BMS). Pooled from 2 wells.

**(L)** QIBC of DNA content in mimosine arrested RPE-1 cells using protocol in Figure 5F, compared to cycling cells. n = 52,433 cells (mimosine arrested) and 61,472 cells (cycling). Representative of 2 independent experiments.

**(M)** QIBC of mCherry (mChy) fluorescence in RPE-1 cells induced in Figure 5F. Dox(-) cells are uninduced TetOn-NLS-mChy cells to determine background signal. n = 2,000 cells per condition. Dashed and solid lines in violin plots are IQR and median, respectively. Cells with mCherry fluorescence within dashed lines were chosen for analysis in Figure 5H.

Figure S6

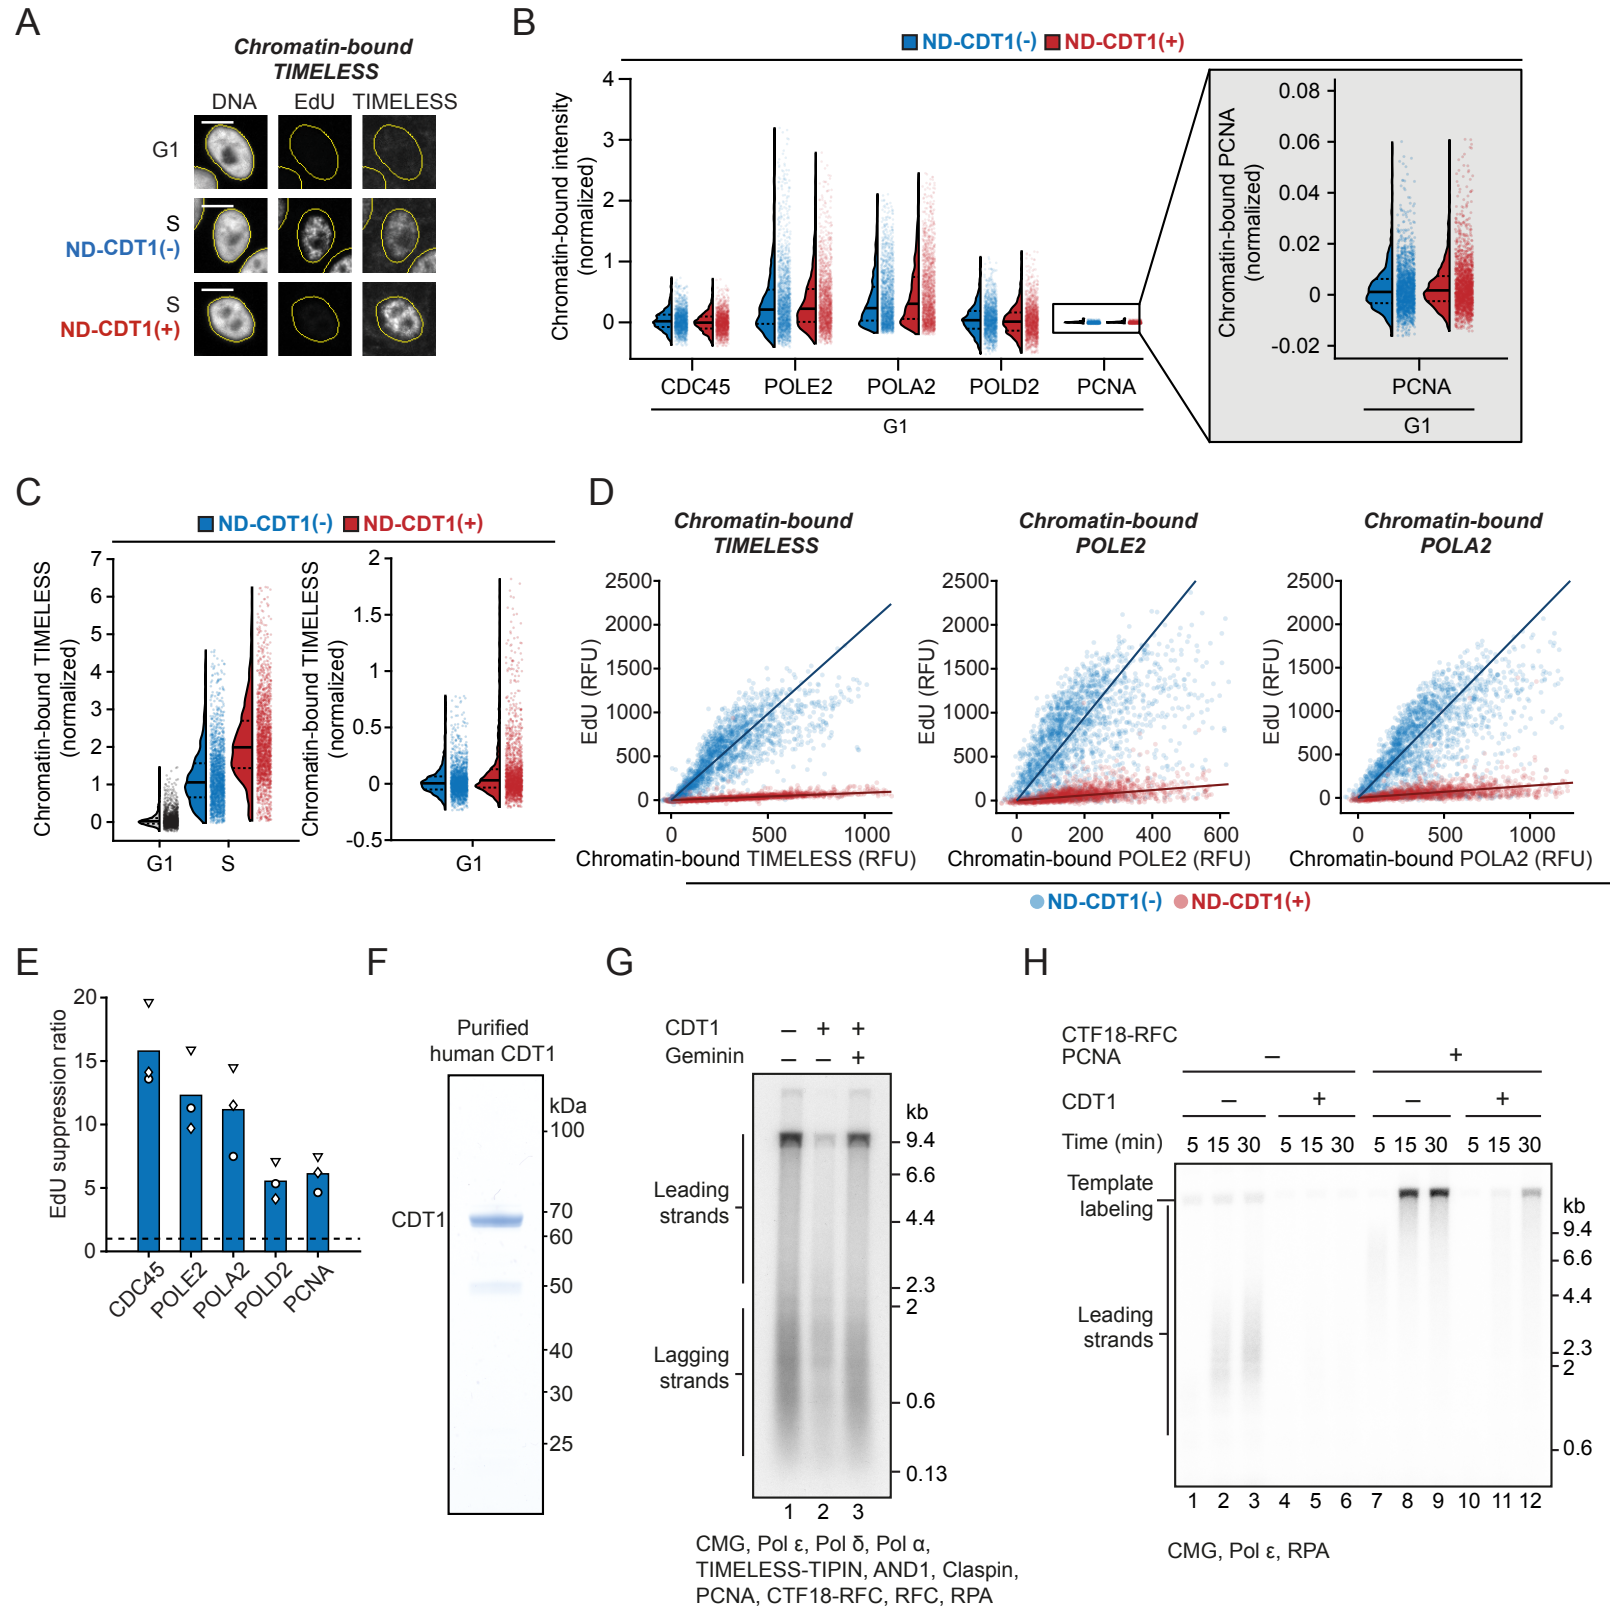

**Figure S6. CDT1 inhibits replication fork elongation while permitting origin firing, related to Figure 6**

**(A-E)** RT-QIBC of chromatin-bound replisome components in mitogen-released MCF10A cells. G1 cells had active APC/C<sup>Cdh1</sup> without chromatin-bound PCNA. Cells which expressed ND-CDT1-mCherry during live imaging were selected for ND-CDT1(+). Representative of 3 independent experiments.

**(A)** Representative cells of chromatin-bound TIMELESS. Scale bar = 10  $\mu$ m.

**(B)** Comparison of chromatin-bound replisome components in G1 with ND-CDT1, in same experiment as Figure 6B. G1 mode intensities from ND-CDT1(-) were subtracted off signals, and values were normalized to the ND-CDT1(-) S phase condition from Figure 6B. n = 2,000 cells per condition. Representative of 3 individual experiments.

**(C)** Comparison of chromatin-bound TIMELESS in S phase (left) and G1 phase (right), analyzed in same way as Figure 6B and Figure S6B. n = 2,000 cells, pooled from 3 wells for ND-CDT1(-), or 7 wells for ND-CDT1(+).

**(D)** Analysis of EdU incorporation as a function of chromatin-bound protein levels for TIMELESS, POLE2, POLA2 in S phase. G1 mode intensities were subtracted off EdU and chromatin-bound intensity. Line is fit line of linear regression (n = 2000 cells). Representative of 3 independent experiments. Other stains in Figure 6D. TIMELESS staining was done in separate experiment as other stains. Cells were pooled from 3 wells for ND-CDT1(-) or 7 wells for ND-CDT1(+) from a single experiment.

**(E)** Summary of slopes from fit lines from Figures 6D and S6D. EdU suppression ratio is defined as the ratio of the fit line in the control condition to the ND-CDT1 condition (>1 indicates there is lower EdU incorporation for a given amount of chromatin-bound protein). Bar is mean of 3 independent experiments.

**(F)** Coomassie-stained SDS-PAGE analysis of purified human CDT1 protein.

**(G)** Denaturing agarose gel analysis of leading/lagging strand replication reactions (9.7 kbp DNA template) for 20 min with the indicated proteins. 10 nM CDT1 was pre-incubated with equimolar Geminin for 5 min on ice before adding to the reactions where indicated. In all reactions, the concentration of potassium glutamate was 250 mM. Experiment was repeated 3 times.

**(H)** Denaturing agarose gel analysis of a time course experiment performed on the 15.8 kbp forked DNA template with the indicated proteins. CTF18-RFC, PCNA, and CDT1 were included where indicated. CMG-independent template labeling products are indicated. Experiment was repeated two times.

Dashed and solid lines in violin plots are IQR and median, respectively.

Figure S7

A

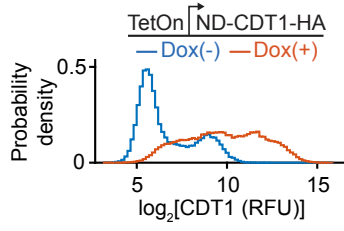

B

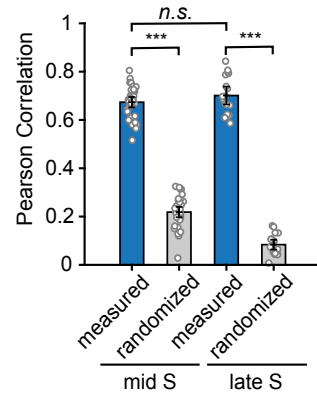

C

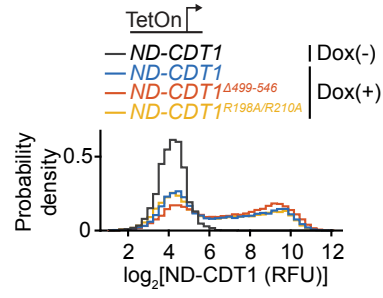

**Figure S7. CDT1 inhibits CMG helicase through its MCM-binding domains, related to Figure 7**

**(A)** QIBC of CDT1 immunofluorescence in non-pre extracted U2OS cells overexpressing doxycycline (Dox)-inducible ND-CDT1 as in Figure 7D to compare overexpression levels.  $n = 56,309$  (Dox-),  $57,484$  (Dox+) cells. Cells were pooled from 6 individual wells per condition.

**(B)** Quantification of colocalization of ND-CDT1 with chromatin-bound CDC45 from Figure 7D. U2OS cells with endogenously tagged CDC45 and Dox-inducible ND-CDT1 were treated with Dox for 8 h and then pre-extracted and co-stained for ND-CDT1(anti-HA-tag) and CDC45 (anti-GFP) by immunofluorescence. Cells were imaged using SoRa confocal microscopy and staged as either mid or late S phase based on CDC45 pattern. Colocalization of ND-CDT1 and CDC45 were calculated from the Pearson correlation between the two signals within the nucleus. Randomized data was generated from the mean of correlations from images shifted 40 pixels ( $1.038 \mu\text{m}$ ) up, down, left, and right from each other.  $n = 35$  (mid S) or  $18$  (late S) cells. Error bars are  $2 \times \text{SEM}$ . Two-sample  $t$ -test: mid S measured – mid S randomized (\*\* $p$ -value =  $6.9 \times 10^{-41}$ ), late S measured – late S randomized (\*\* $p$ -value =  $1.1 \times 10^{-25}$ ), mid S measured – late S measured (n.s.  $p$ -value = .17).

**(C)** ND-CDT1 expression for ND-CDT1 mutants shown in Figure 7E. Mitogen-released MCF10A cells, treated with siGeminin and induced with Dox. ND-CDT1 was stained using anti-HA antibody. Note that ND-CDT1 expression levels are similar for all mutants.  $n \geq 2146$  cells for all conditions. Data representative of two independent experiments.
